# Supplementary material
Source: PubMed Central journal article supplement (PMC1291270)
Supplement: jbacter_187_23_8137__1.pdf [file jbacter_187_23_8137__1.pdf]

1 **Supplemental Materials**

2

3 **TABLE S1. Primers used to construct HexPPs mutants in this study.**

| <b>Mutant</b>            | <b>Primer sequence</b>                               |
|--------------------------|------------------------------------------------------|
| <b>D81C</b>              | 5'-CCATTCTGCTTCCTTAGCTTTGTGTGATATAGTTGATCTCGACG-3'   |
| <b>Y124A</b>             | 5'-GCTCTAAGGATAATTCAGACTTCTGCTGGTGACGATGCTTTA-3'     |
| <b>Y174A</b>             | 5'-TCTACGGTACTATCAGCCGCCGCTTCTAAACACTATAATACG-3'     |
| <b>L164A</b>             | 5'-TTAAAAACCGGTAGTGCATTTAAGCTCTCTACGGTACTATCAGCC-3'  |
| <b>L164G</b>             | 5'-TTAAAAACCGGTAGTGGATTTAAGCTCTCTACGGTACTATCAGCC-3'  |
| <b>W136E</b>             | 5'-TACTAGTATTGAGTTAGAGAAAGACACCTCAGTGGGTGCTCTAAG-3'  |
| <b>F117E<sup>a</sup></b> | 5'-GATCTTGTACTTGTTCAGTGCGGAACATACGGTTGAAGAGATAGGA-3' |

4 <sup>a</sup> F117E OPPs mutant of *T. maritima*

5

1 Figure S1. The two subunits of *S. solfataricus* HexPPs are superimposed. Monomer A  
2 and B are shown in orange and green, respectively. The residues 84-100 shown in  
3 stick model cannot superimposed. The diagram was produced with PyMOL.

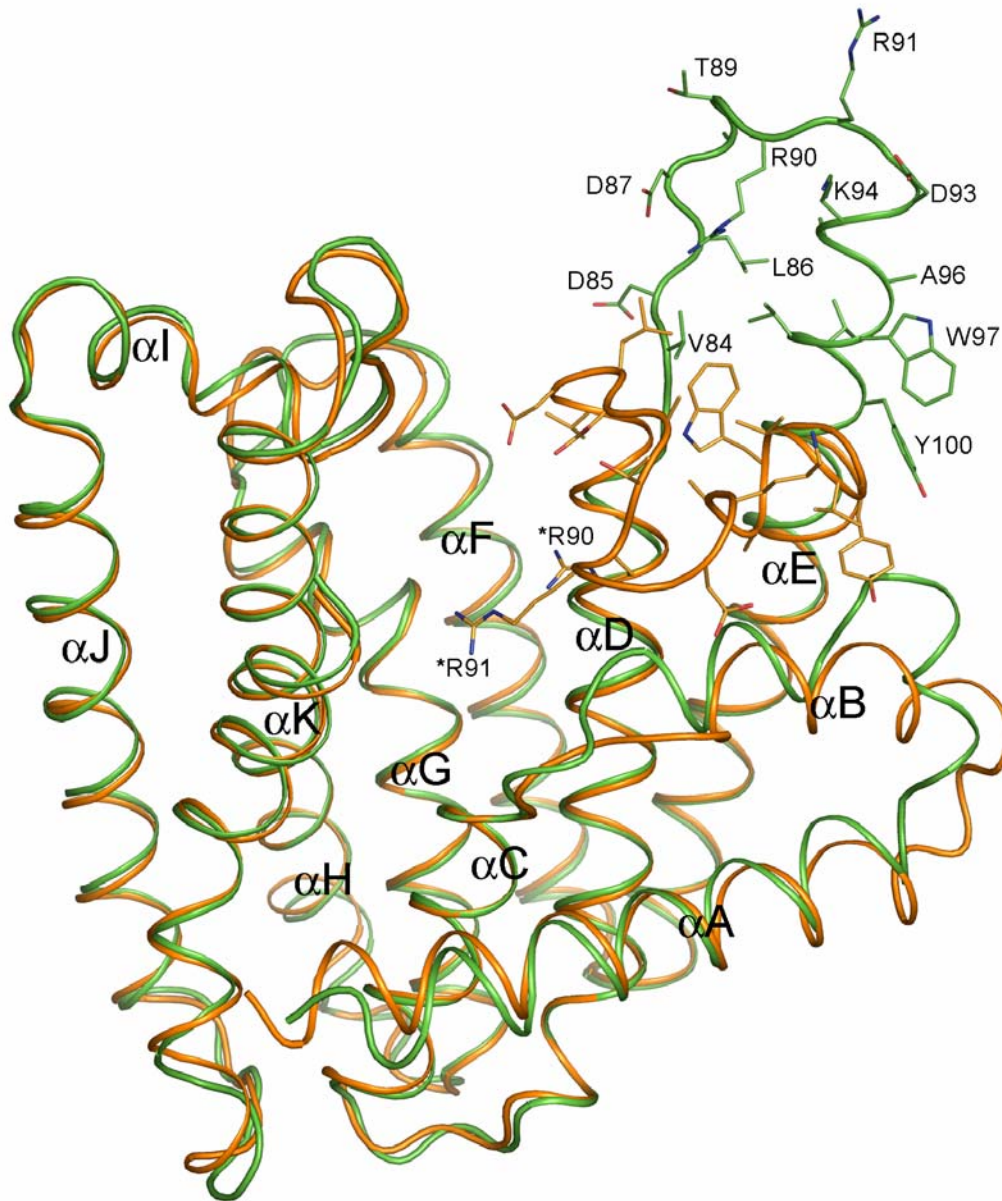

4

5

Sun *et al.*, Figure S1

1 Figure S2. The neighboring HexPPs molecules in the symmetry-related unit cells  
2 are shown in different colors. The arrow indicates the helices D and E of  
3 monomer B interacting with the neighboring HexPPs enzymes. The oval indicates  
4 that there is space for helices H-K in monomer B to move, and this may cause  
5 high B factors of monomer B. The diagram was produced with PyMOL.

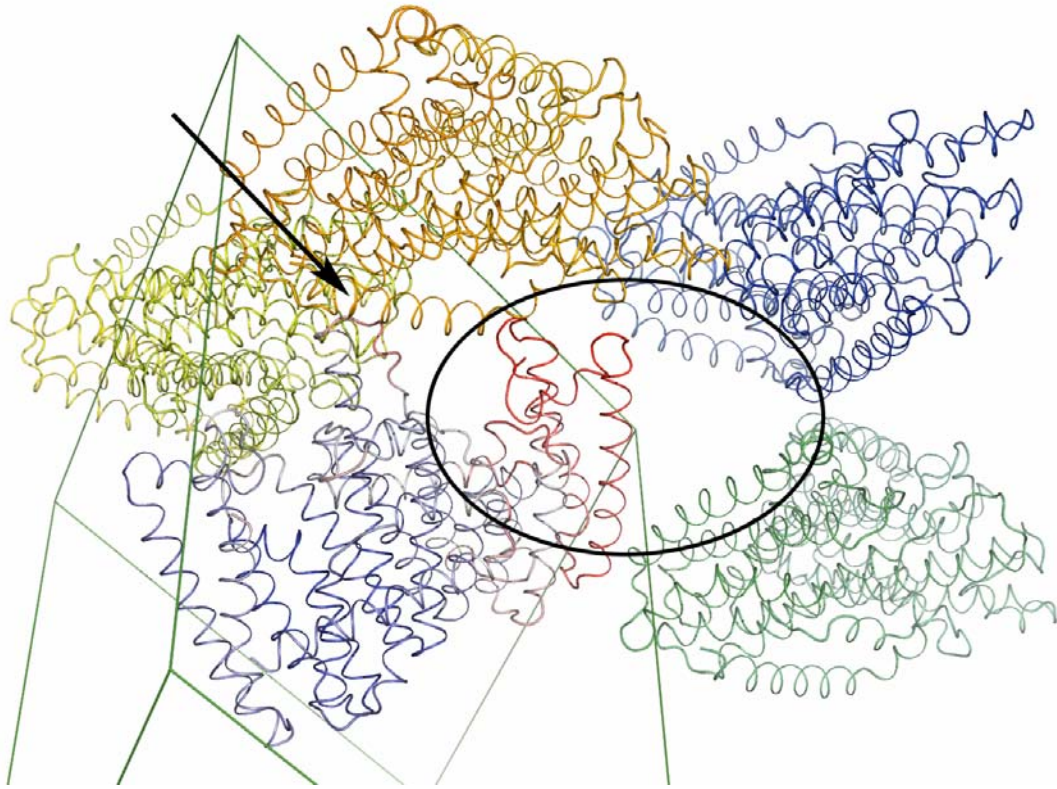

6  
7  
8

Sun *et al.*, Figure S2

1 Figure S3. The three *trans*-PTases are superimposed. The FPPs complex of Protein  
2 Data Bank structure 1RQI is shown in blue, the OPPs of 1V4E is shown in yellow,  
3 and the monomer A and B of HexPPs crystal structures studied here are in orange and  
4 green, respectively. Monomer A of HexPPs has a similar conformation to OPPs of  
5 1V4E. FPPs complex reveals active-site conformational changes localized at the  
6  $\alpha$ D- $\alpha$ E and  $\alpha$ H- $\alpha$ J loops (arrow) (10). The residues R116 and R117 in  $\alpha$ D- $\alpha$ E loop,  
7 residue K258 in  $\alpha$ H- $\alpha$ J loop are shown in stick. The diagram was produced with  
8 PyMOL.

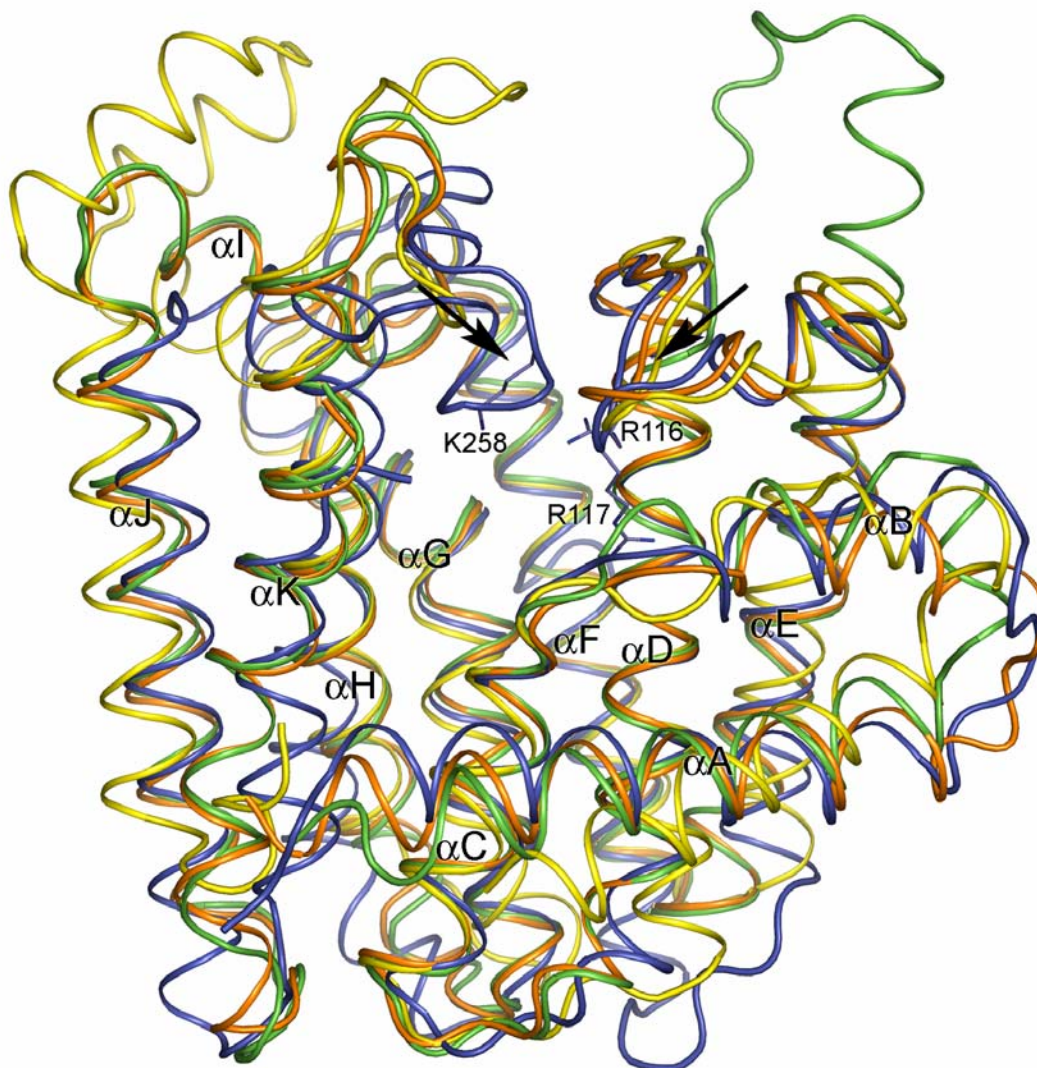

9  
10

Sun *et al.*, Figure S3
